# Supplementary material for: Structuring polarity-inverted TBA to G-quadruplex for selective recognition of planarity of natural isoquinoline alkaloids
Source: Royal Society of Chemistry journal article supplement (doi:10.1039/c8an01561a), 2018-01-01
Supplement: c8an01561a1.pdf [file c8an01561a1.pdf]

# Structuring polarity-inverted TBA to G- quadruplex for selective recognition of planarity of natural isoquinoline alkaloids

Yufeng Zhou,<sup>†</sup> Yali Yu,<sup>†</sup> Longlong Gao,<sup>†</sup> Yifan Fei,<sup>†</sup> Ting Ye,<sup>†</sup> Qiusha Li,<sup>†</sup> Xiaoshun Zhou,<sup>†</sup> Ning Gan,<sup>§</sup> and Yong Shao<sup>\*,†</sup>

<sup>†</sup>Institute of Physical Chemistry, College of Chemistry and Life Sciences, Zhejiang Normal University, Jinhua 321004, Zhejiang, China

<sup>§</sup>Faculty of Material Science and Chemical Engineering, Ningbo University, Ningbo 315211, Zhejiang, China

\*E-mail: yshao@zjnu.cn (S. Y.). Fax: 86 579 82282595

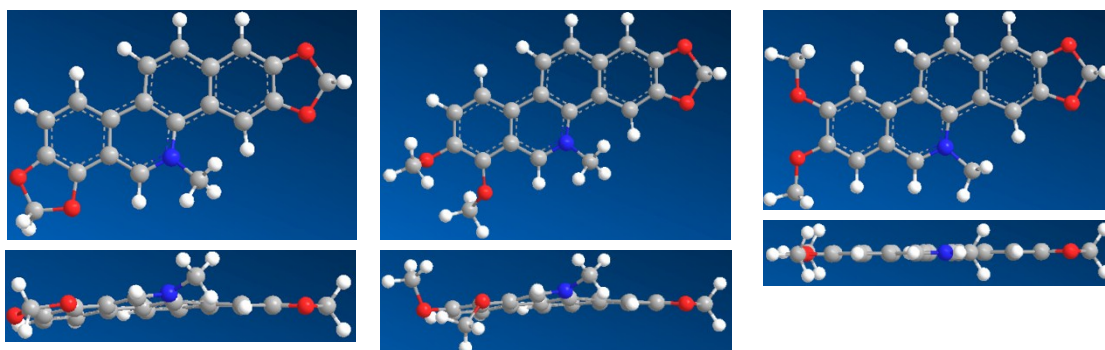

SAN

CHE

NIT

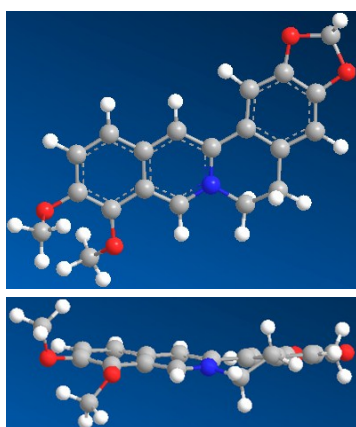

BER

**Scheme S1.** Top-viewed (up) and side-viewed (down) structures of IAs. For PAs, only BER is presented because of the structure similarity to show the saturated ring B induced non-planarity.

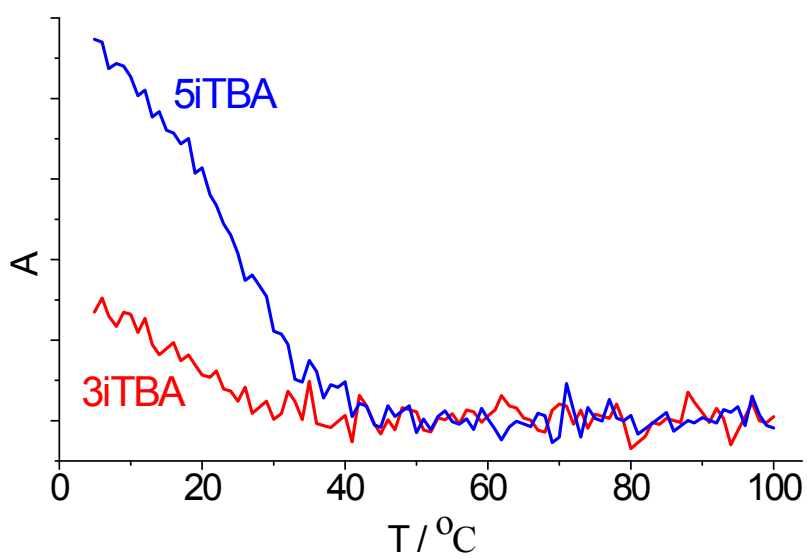

**Figure S1.** Melting curves of 3  $\mu$ M 3iTBA and 5iTBA in 0.05 M Tris-HCl buffer (pH 7.0) containing 0.1 M  $K^+$ .

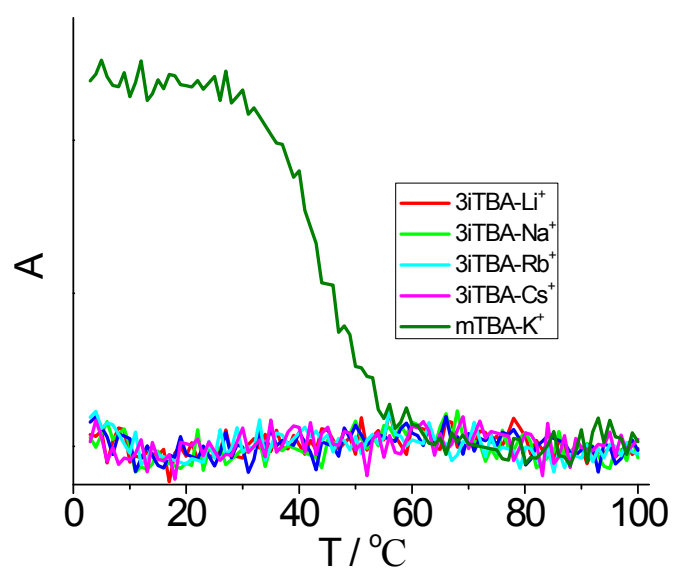

**Figure S2.** Melting curves of 3  $\mu\text{M}$  3iTBA in 0.05 M Tris-HCl buffer (pH 7.0) containing 0.1 M  $\text{Li}^+$ ,  $\text{Na}^+$ ,  $\text{Rb}^+$ , and  $\text{Cs}^+$ , respectively. That of mTBA in  $\text{K}^+$  is also shown as a control.

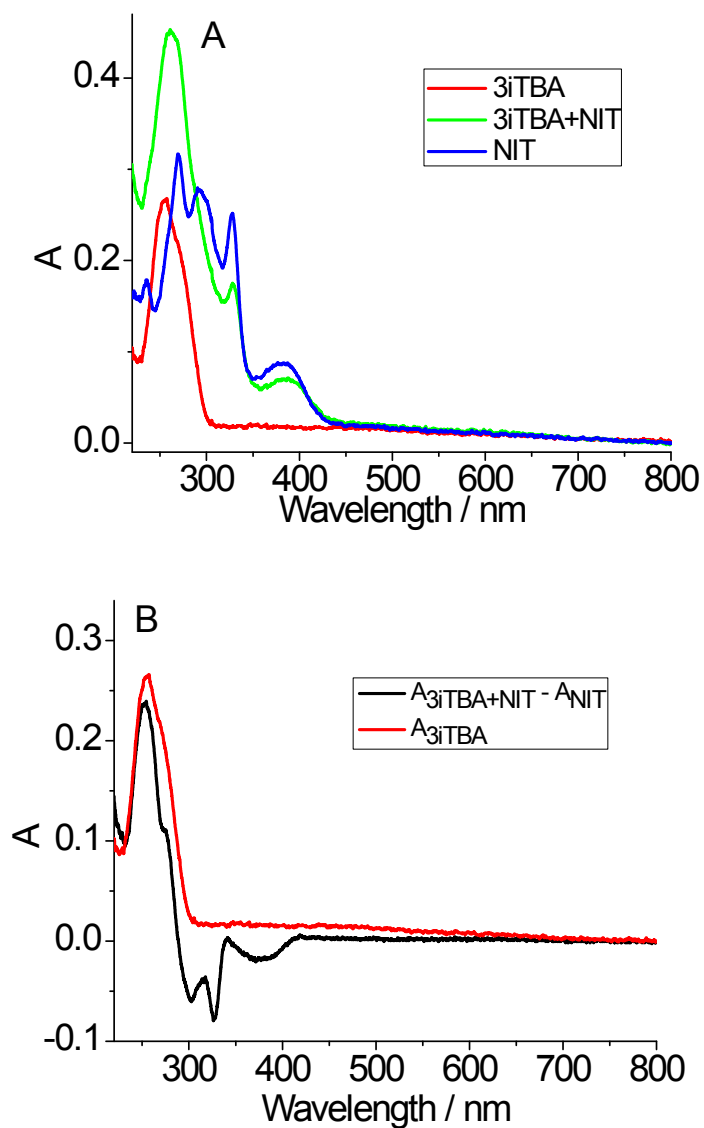

**Figure S3.** (A) Absorption spectra of 3iTBA (2  $\mu$ M), NIT (10  $\mu$ M), and their mixture in 0.1 M PBS buffer (pH 7.0). (B) Absorption difference spectra of 3iTBA in the presence of NIT after subtracting that of NIT alone. Also shown is that of 3iTBA alone for a comparison to show the 3iTBA folding upon the NIT addition.

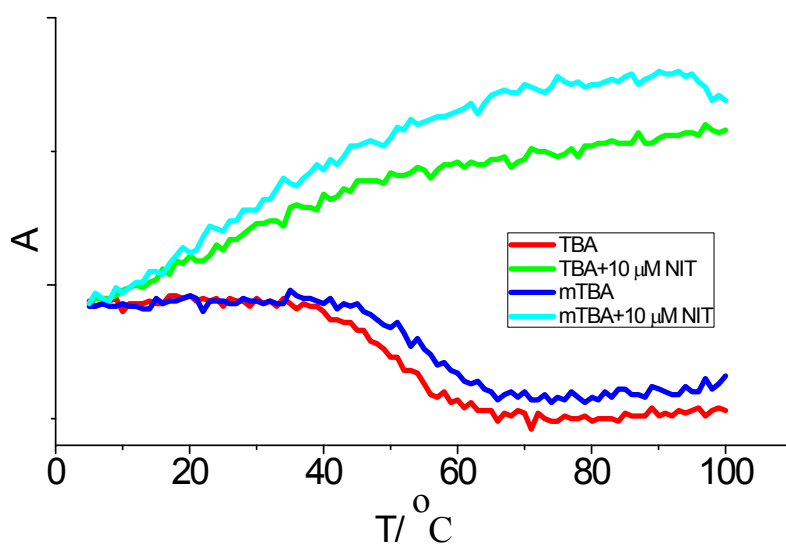

**Figure S4.** Melting curves of TBA and mTBA (3  $\mu\text{M}$ ) in the absence and presence of NIT (10  $\mu\text{M}$ ) in 0.1 M PBS buffer (pH 7.0,  $\text{K}^+$ ). The absorbance at the starting temperature of 3  $^{\circ}\text{C}$  was normalized for comparison.

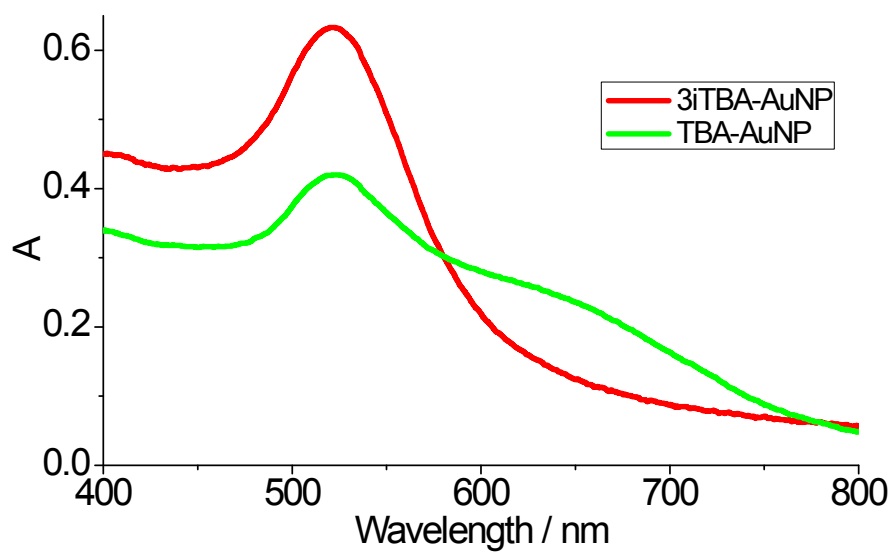

**Figure S5.** Absorption spectra of AuNPs in PBS buffer (pH 7.0, 35 mM K<sup>+</sup>) containing 3iTBA and TBA, respectively.
